# Supplementary material
Source: publisher figshare collection journal article supplement (https://acs.figshare.com/ndownloader/files/5534189)
Supplement: Supplementary file 1 [file 5534189]

# **Novel Water Soluble Cyclodextrin-Based Conjugated Polymer for Selective Host-Guest Interactions of Cationic Surfactant CTAB and Reverse FRET with Rhodamine B Tagged Adamantyl Guest**

Atul Kumar Dwivedi,<sup>a</sup> Ravinder Singh,<sup>a</sup> Ashutosh Singh,<sup>a</sup> Kung-Hwa Wei,<sup>a</sup> Chu-Ya Wu,<sup>b</sup> Ping-Chiang Lyu,<sup>b</sup> and Hong-Cheu Lin<sup>a\*</sup>

<sup>a</sup>Department of Materials Science and Engineering, National Chiao Tung University, Hsinchu 300, Taiwan

<sup>b</sup>Institute of Bioinformatics and Structural Biology, National Tsing Hua University, Hsinchu 300, Taiwan

[linhc@mail.nctu.edu.tw](mailto:linhc@mail.nctu.edu.tw)

## **Table of Contents**

**<sup>1</sup>H NMR Spectra and <sup>13</sup>CNMR spectra of small molecule intermediates, P0 GPC data, PL intensity changes of P1 in the presence of SDS, Triton X 100, DTAB, DOTAB and bar diagram demonstrating the PL intensity of P1 in the presence of various metal ions in water.**

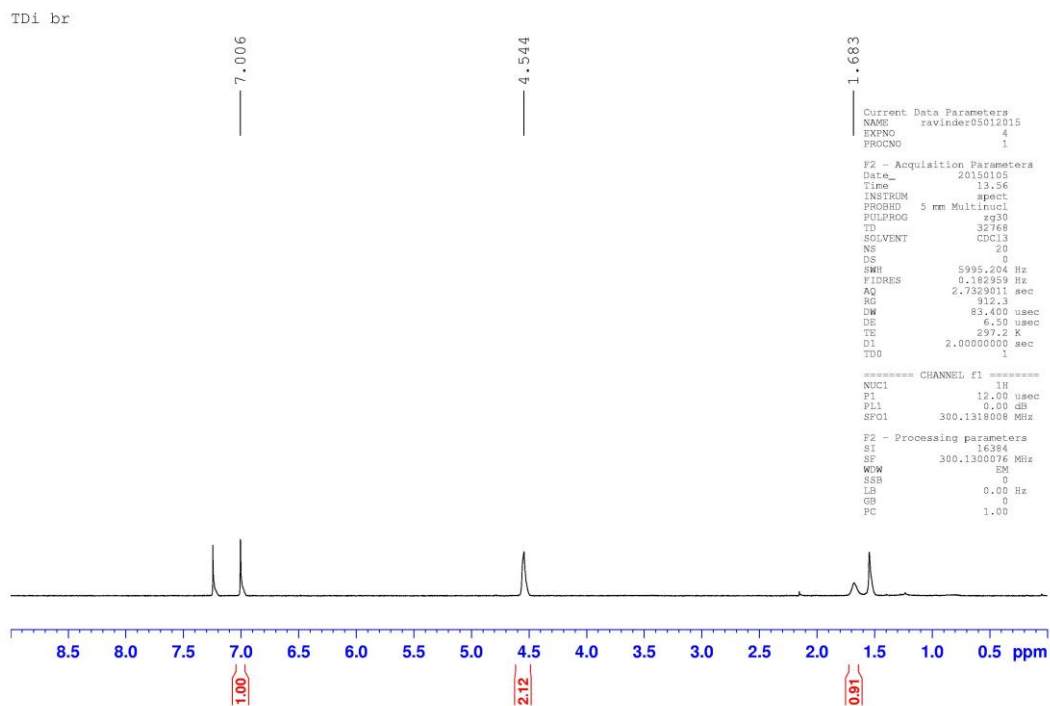

**Figure S1.**  $^1\text{H}$  NMR spectrum of **1**.

triple dibr

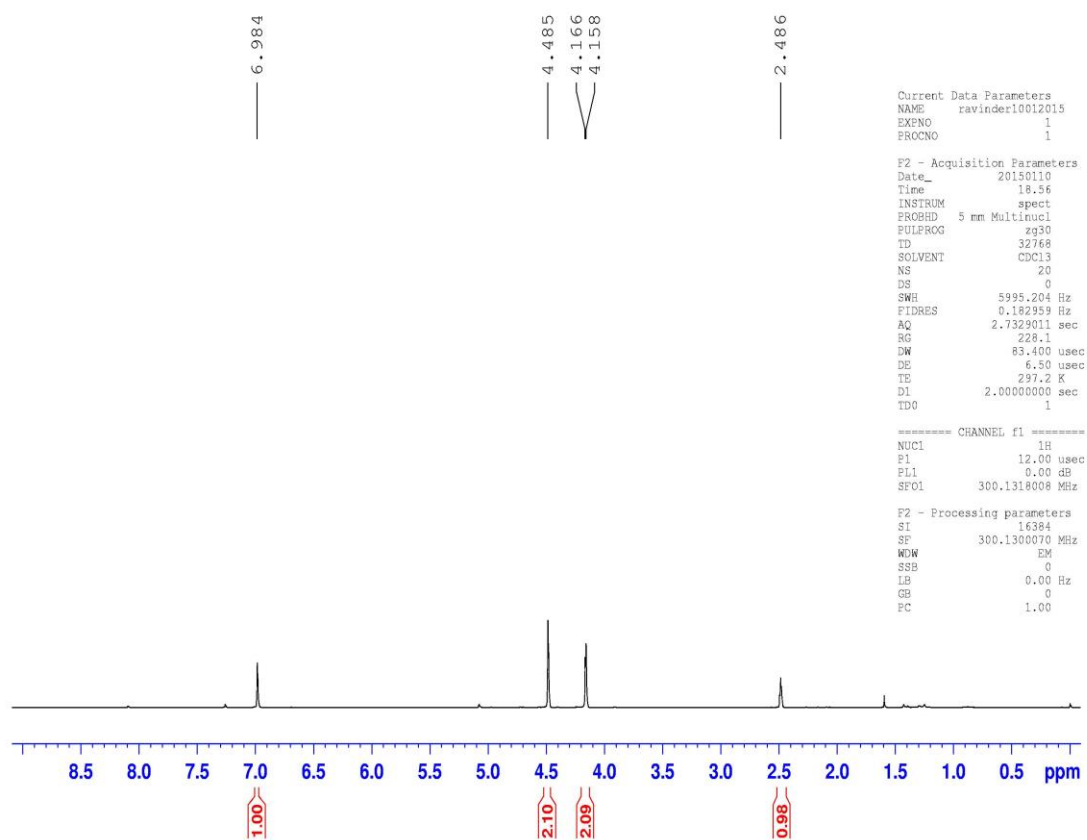

**Figure S2.**  $^1\text{H}$  NMR spectrum of **2**.

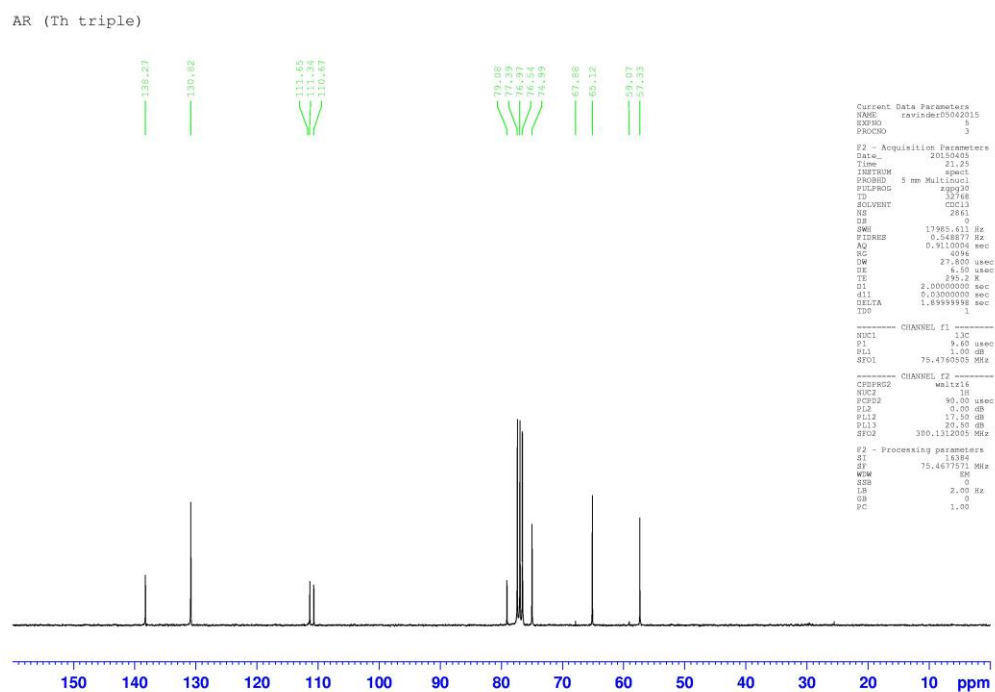

**Figure S3.**  $^{13}\text{C}$  NMR spectrum of **2**.

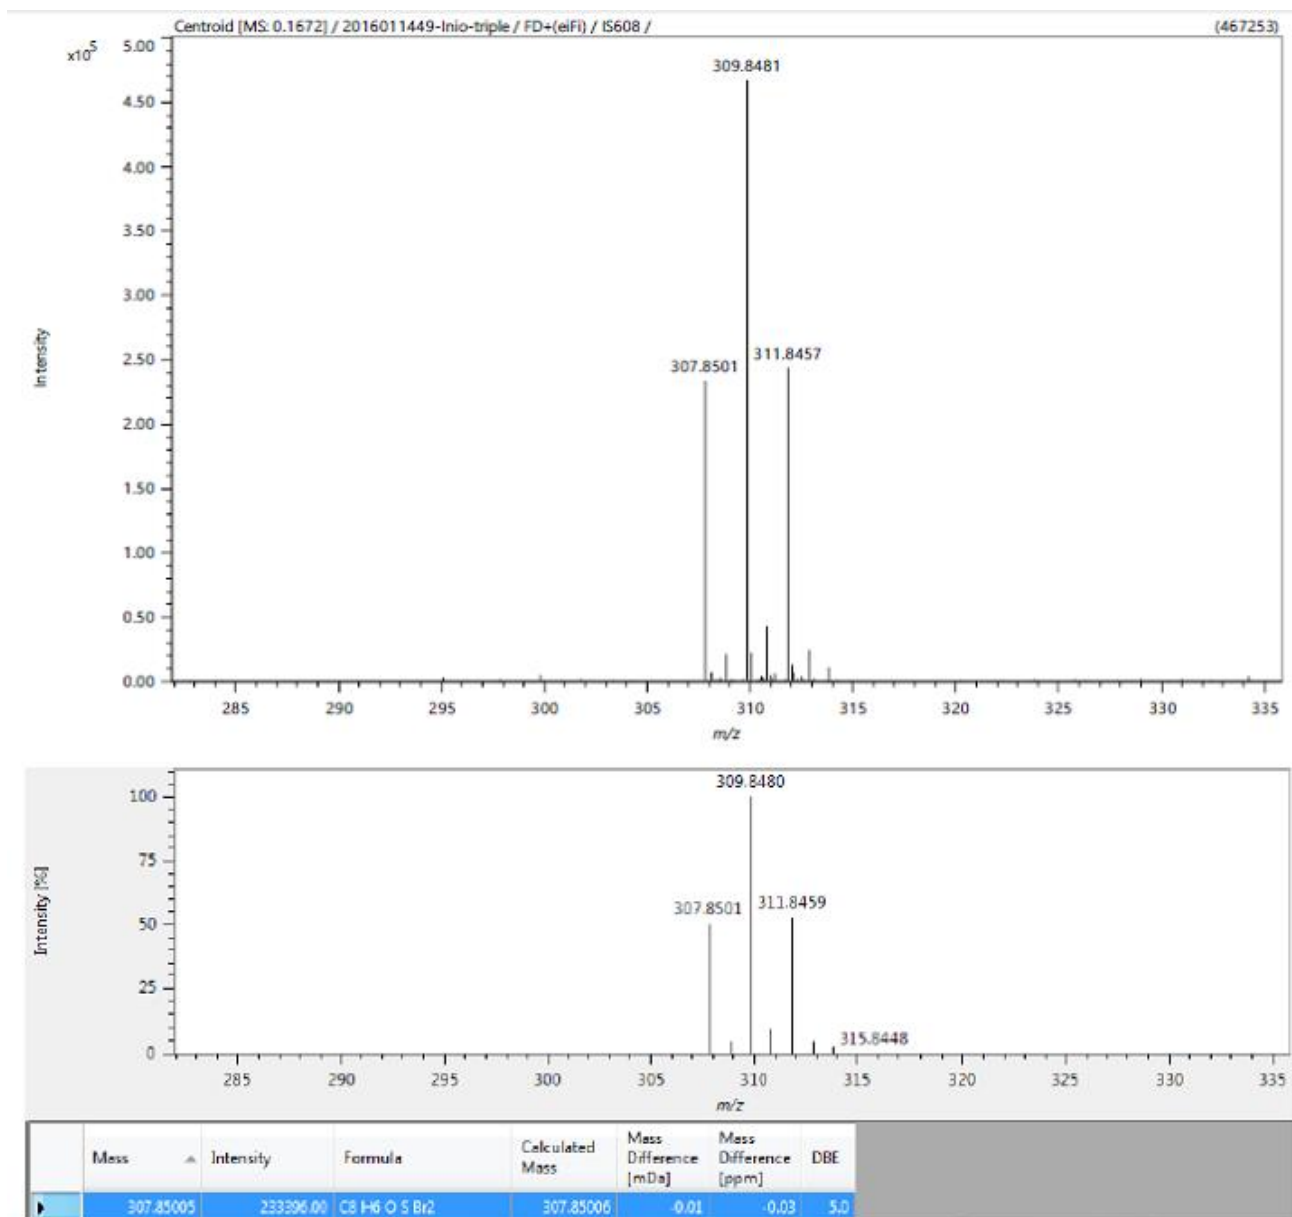

**Figure S4.** HRFD-MS data of **2**.

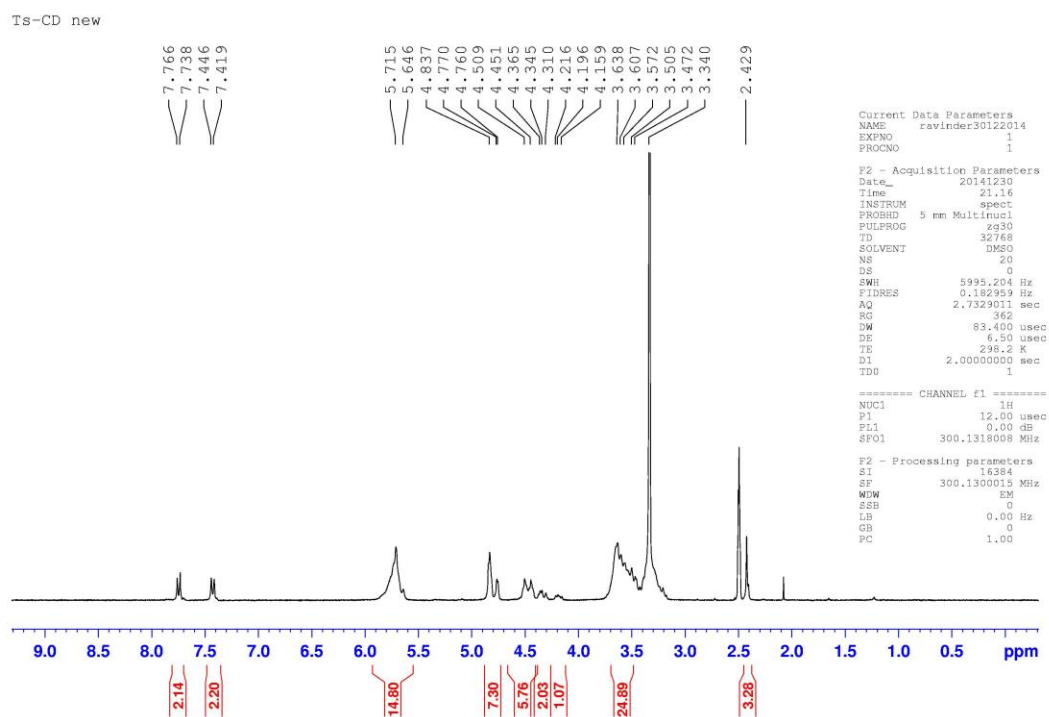

**Figure S5.**  $^1\text{H}$  NMR spectrum of Ts-CD.

N3 CD

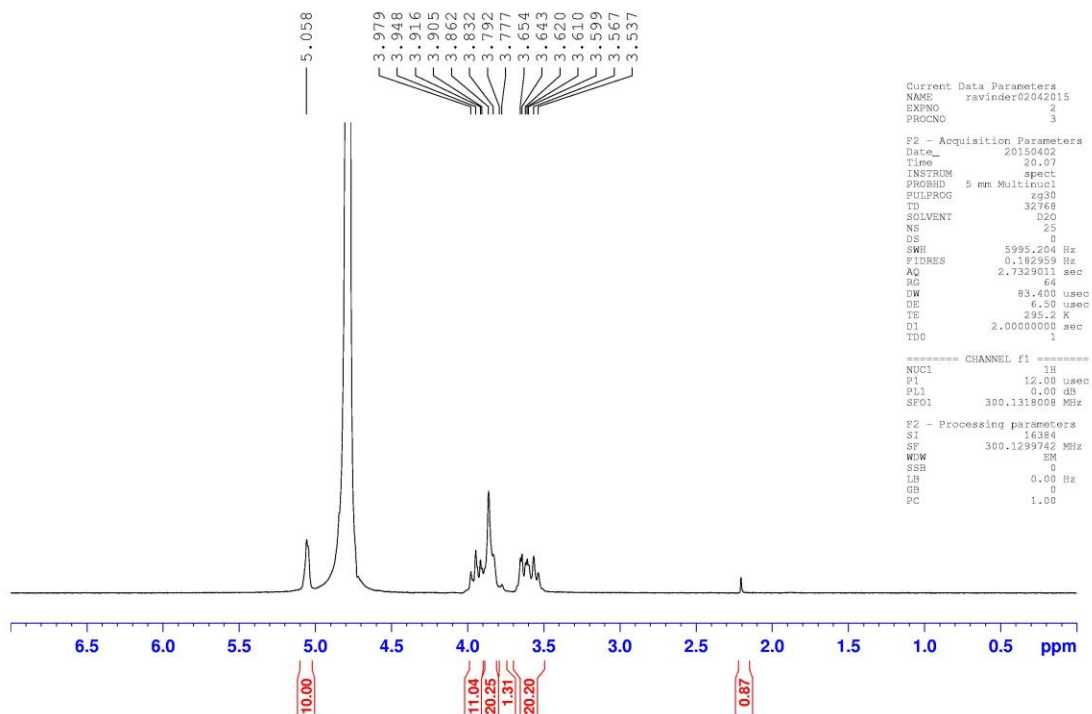

**Figure S6.**  $^1\text{H}$  NMR spectrum of N3-CD.

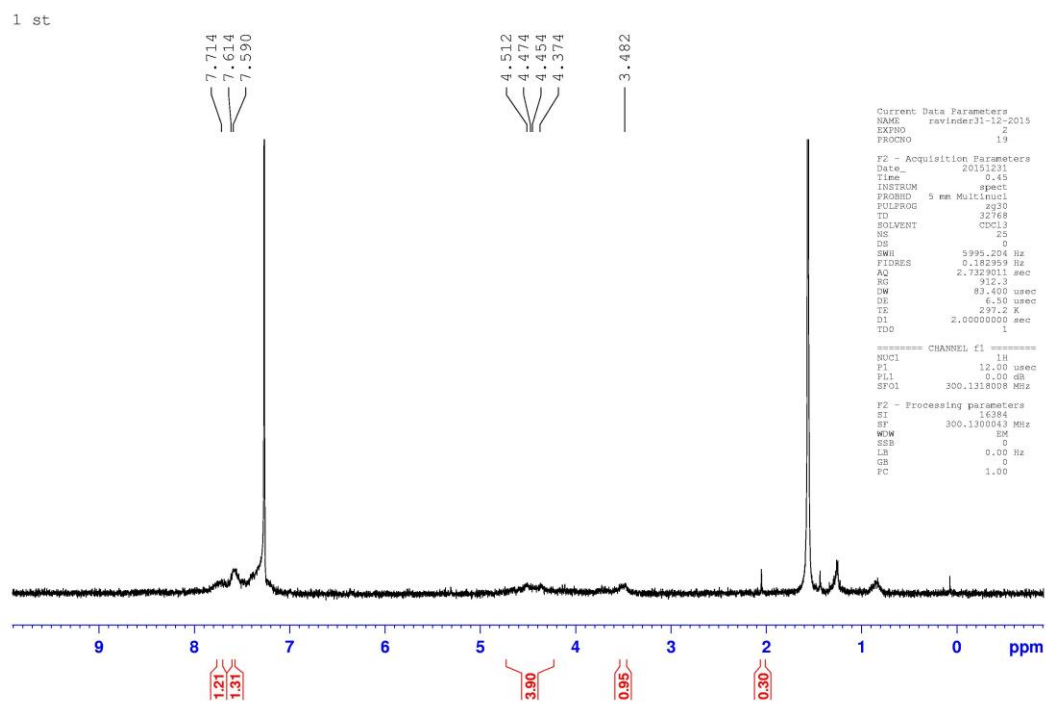

**Figure S7.**  $^1\text{H}$  NMR spectrum of **P0**.



P1 New

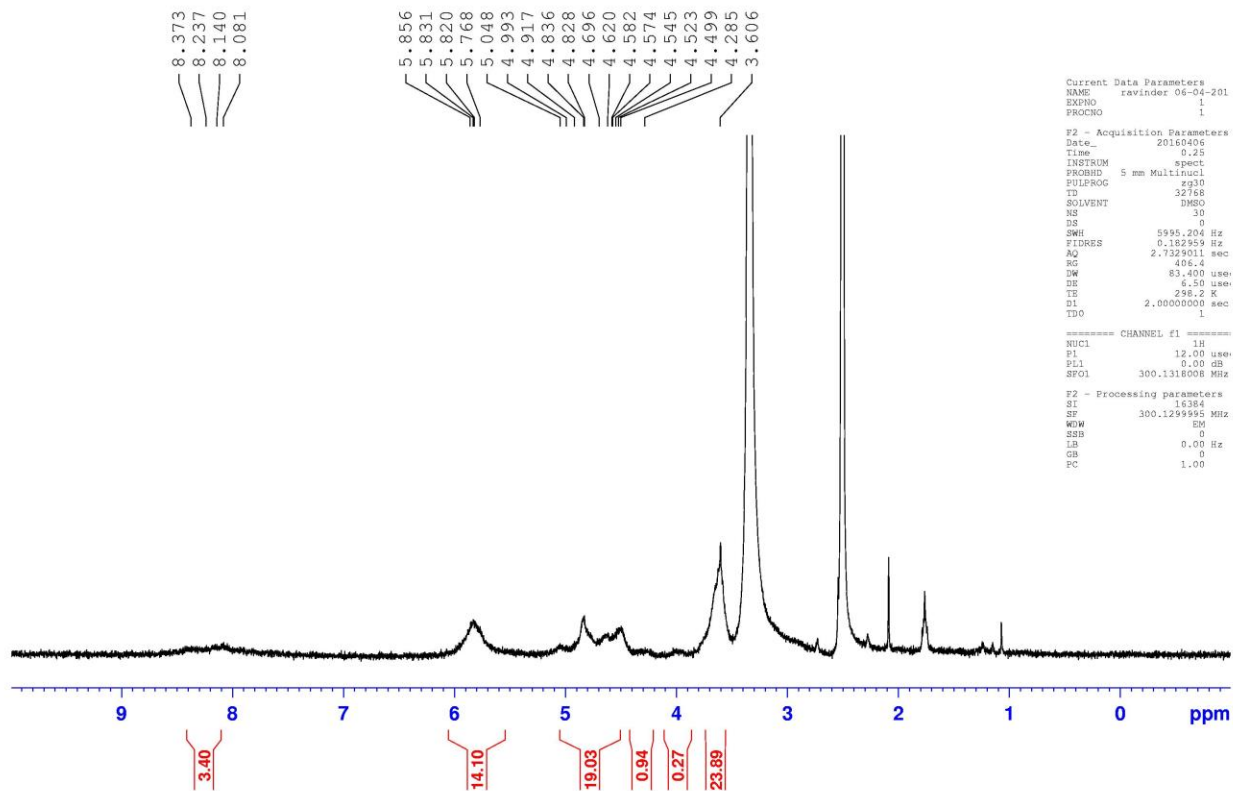

Figure S8.  $^1\text{H}$  NMR spectrum of P1.

## SAMPLE INFORMATION

|                   |               |                  |                    |
|-------------------|---------------|------------------|--------------------|
| Sample Name       | Unk           | Acquired By:     | System             |
| Sample Type:      | Broad Unknown | Date Acquired:   | 2015/8/28 02:36:36 |
| Vial:             | 1             | Acq. Method:     | THF_40_1           |
| Injection #:      | 1             | Date Processed:  | 2015/8/28 03:08:12 |
| Injection Volume: | 200.00 ul     | Channel Name:    | 410                |
| Run Time:         | 30.00 Minutes | Sample Set Name: | 20150828_joven     |

## Autoscaled Chromatogram

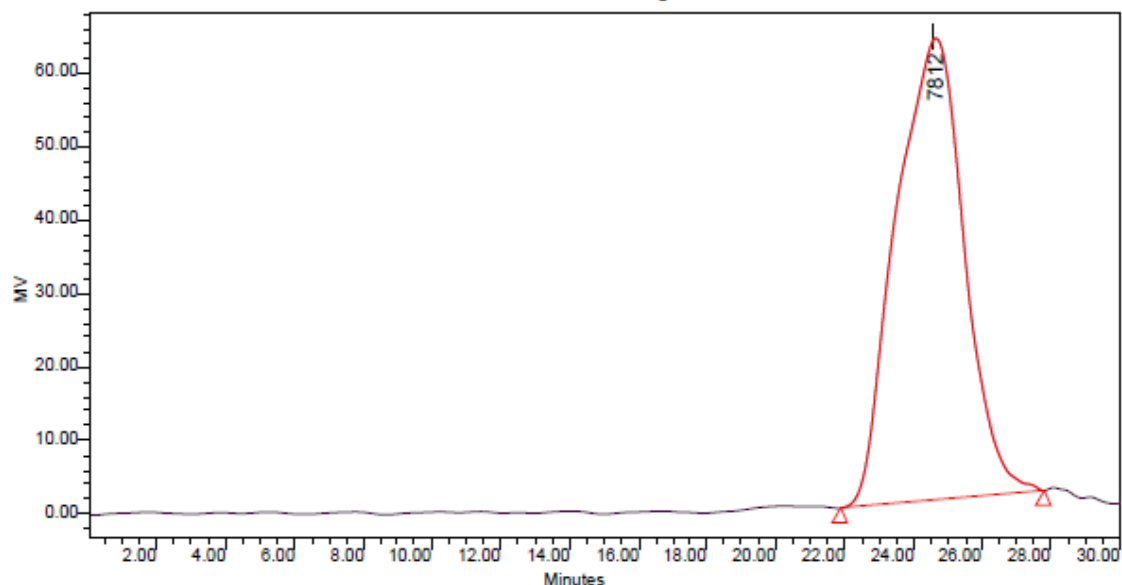

## GPC Results

|   | Dist Name | Elution Volume (ml) | Retention Time (min) | Adjusted RT (min) | Mn   | Mw    | MP   | Mz    | Mz+1  | Mz/Mw    | Mz+1/Mw  |
|---|-----------|---------------------|----------------------|-------------------|------|-------|------|-------|-------|----------|----------|
| 1 |           | 24.618              | 24.618               | 24.618            | 7839 | 10040 | 7812 | 12733 | 15565 | 1.268237 | 1.550300 |

## GPC Results

|   | Area (sec) | % Area | Height ( ) | % Height | Integration Type | Peak Codes | Points Across Peak | Start Time (min) | End Time (min) | Baseline Start (min) |
|---|------------|--------|------------|----------|------------------|------------|--------------------|------------------|----------------|----------------------|
| 1 | 8682384    | 100.00 | 62778      | 100.00   | BB               |            | 354                | 21.850           | 27.767         | 21.850               |

## GPC Results

|   | Baseline End (min) | Slope ( /sec) | Offset ( )     |
|---|--------------------|---------------|----------------|
| 1 | 27.767             | 4.034762e-001 | -7.842337e+000 |

Figure S9. GPC data of P0.

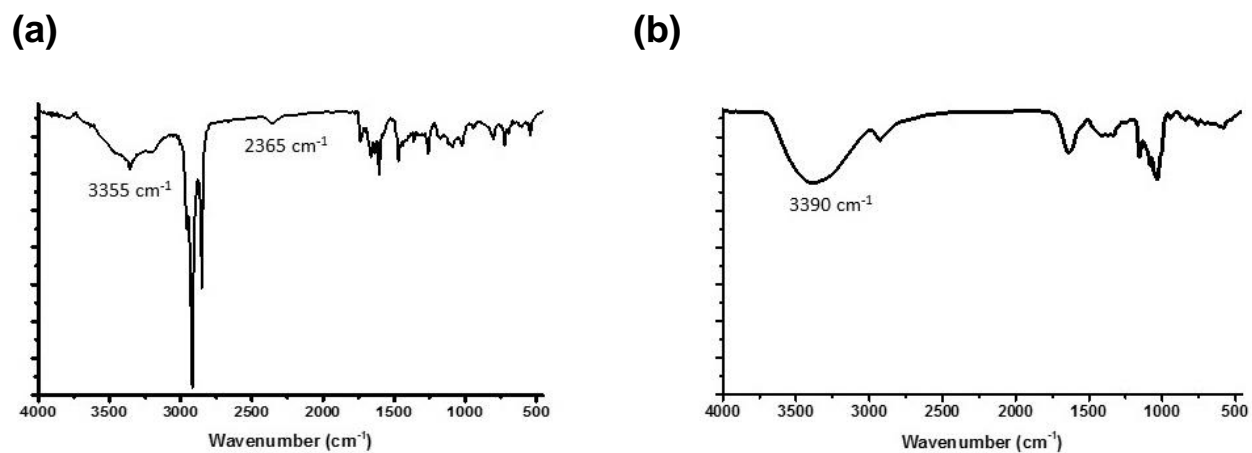

**Figure S10.** FT-IR spectra of (a) **P0** and (b) **P1**.

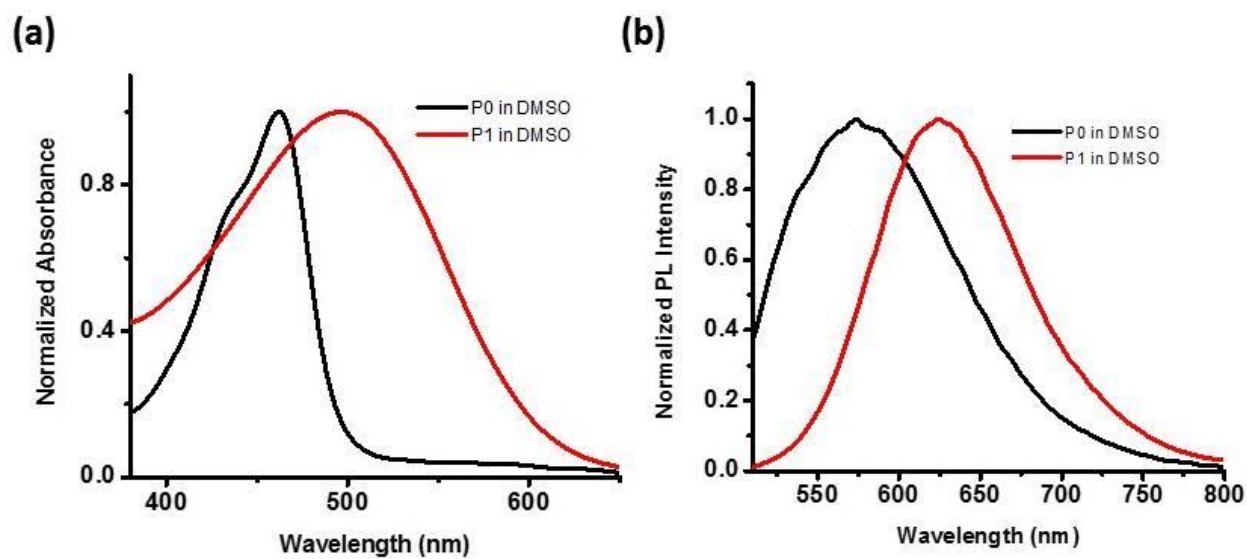

**Figure S11.** Normalized (a) Absorption and (b) PL spectra of **P0** and **P1** in DMSO.

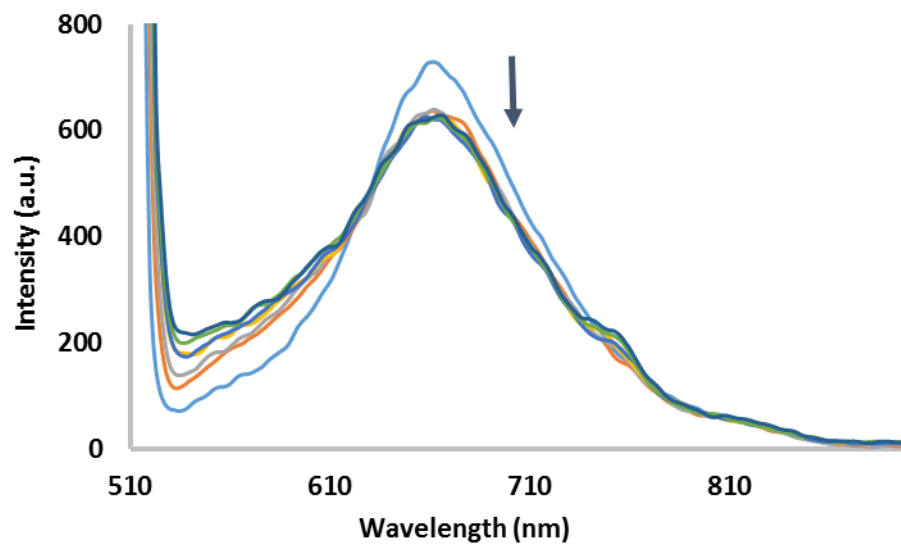

**Figure S12.** PL spectra of **P1** (10  $\mu\text{M}$ ) in the presence of 10 equivalents of SDS in water.

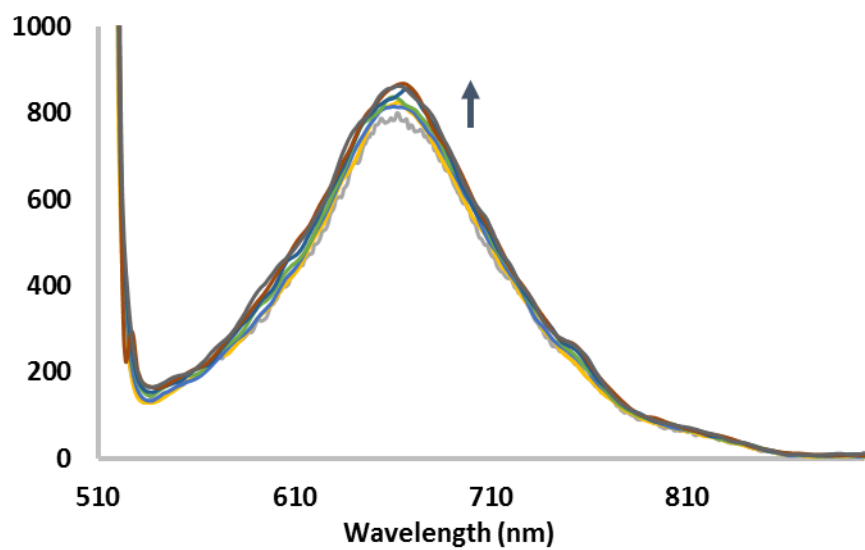

**Figure S13.** PL spectra of **P1** (10  $\mu\text{M}$ ) in the presence of 10 equivalents of Triton X 100 in water.

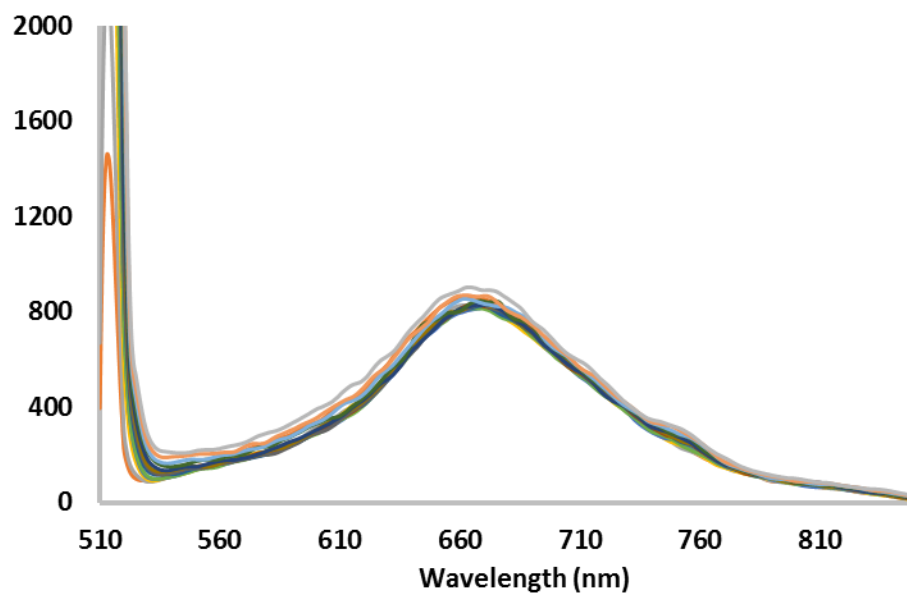

**Figure S14.** PL spectra of **P1** (10  $\mu\text{M}$ ) in the presence of 10 equivalents of DTAB in water.

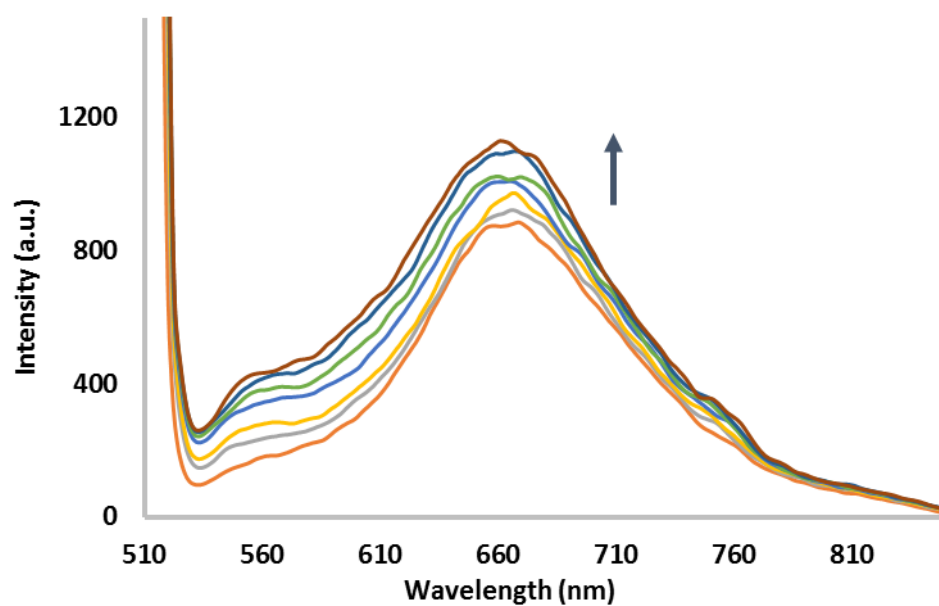

**Figure S15.** PL spectra of **P1** (10  $\mu\text{M}$ ) in the presence of 10 equivalents of DOTAB in water.

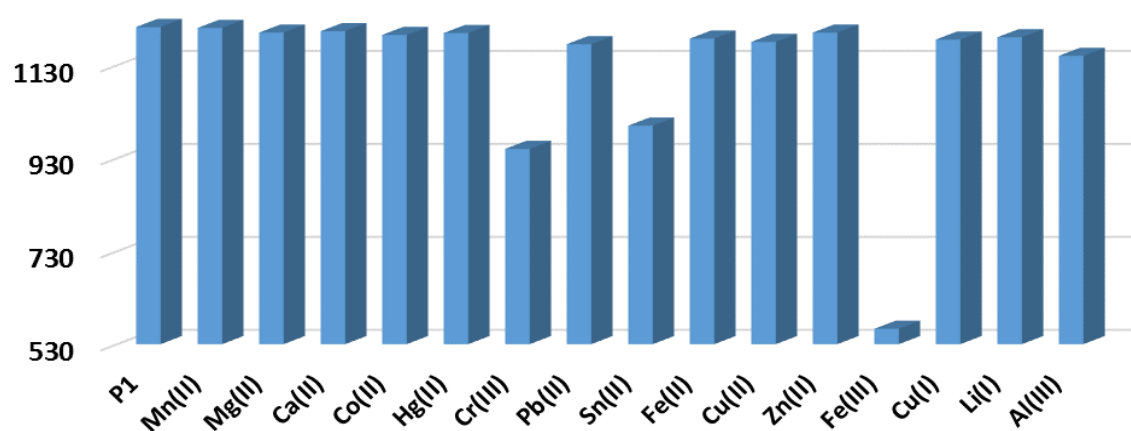

**Figure S16.** PL intensity changes of **P1** (10  $\mu$ M) in the presence of 5 equivalents of various metal ions in pure water.

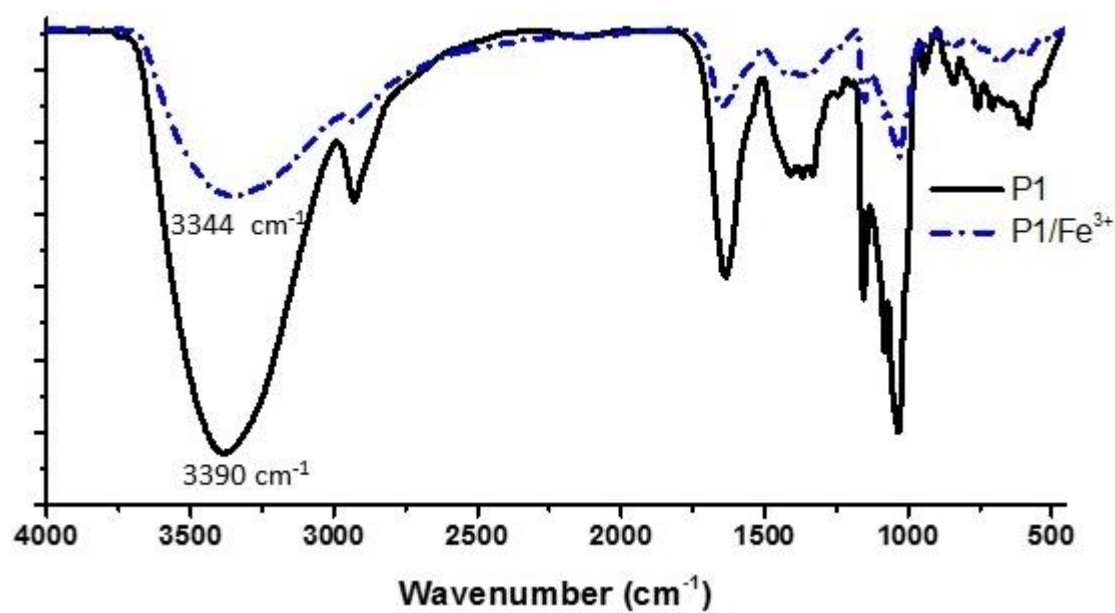

**Figure S17.** FT-IR spectra of **P1** in the absence and presence of  $\text{Fe}^{3+}$  ion.

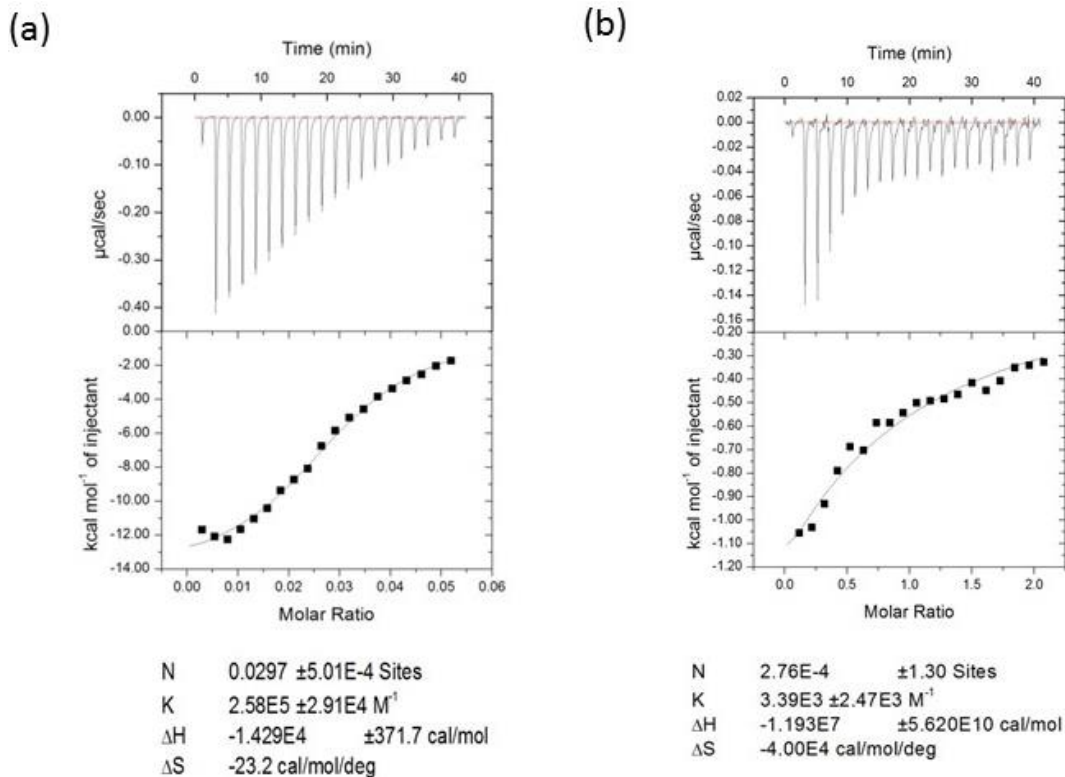

**Figure S18.** Titration profiles at 298 K when **P1** (1%DMSO/H<sub>2</sub>O) was mixed at 20  $\mu\text{L}$  per injection with a solution of (a) CTAB and (b) **ADRhB** in pure water. Curves in bottom figures show the fitting of data to a one-set model by the nonlinear fitting algorithm supplied by the instrument.
